# Supplementary material for: Efficacy of two lines of pupa defence in highly specialised Darwin wasp parasitoids associated with spider hosts (Hymenoptera, Ichneumonidae)
Source: Research Square preprint supplement (doi:10.21203/rs.3.rs-1744001/v1), 2022-06-22
Supplement: Supplementary file 1 [file 2d10f6e21ac8e760559c1156.docx]

**Tables**

**Tab. 1.** Number of pupa individuals used in various treatments.

| **Defence type** | **Pupa protection** | **Cocoon wall** | | | |
| --- | --- | --- | --- | --- | --- |
| **Strong** | | **Soft** | |
| *A. carinator* | *Z. albicoxa* | *Z. anomala* | *Z. percontatoria* |
| no defence | control (bare pupa) | 6 | 6 | 3 | 27 |
| by parasitoid | pupa in cocoon | 22 | 11 | 12 | 46 |
| by host | cocoon in 3D aerial web | - | 12 | 5 | 29 |
| by host | cocoon in 3D web on ground | - | 1 | - | 21 |
