# Supplementary material for: Efficacy of two lines of pupa defence in highly specialised Darwin wasp parasitoids associated with spider hosts (Hymenoptera, Ichneumonidae)
Source: Research Square preprint supplement (doi:10.21203/rs.3.rs-1744001/v1), 2022-06-22
Supplement: Supplementary file 2 [file 61b7051e0ffff99a968abd57.docx]

**Tab. 2.** Number of predators used and their characteristics. Social predators were tested in groups of 5(#) or 10(*) individuals, because lone predators were under stress and did not accept any prey.

| **Mouthpart type** | **Foraging guild** | **Predator name** |  | **N** |
| --- | --- | --- | --- | --- |
| Chewing | collector | *Lasius fuliginosus* |  | 31* |
| scavenger | *Acheta domestica* |  | 68 |
| scavenger | *Blatta lateralis* |  | 33 |
| scavenger | *Gryllus assimilus* |  | 18 |
| Sucking | predator | *Platymeris biguttatus* |  | 23 |
| scavenger | *Pyrrhocoris apterus* |  | 28# |
